# Supplementary material for: Low Overpotential Electrochemical Reduction of CO2 to Ethanol Enabled by Cu/CuxO Nanoparticles Embedded in Nitrogen-Doped Carbon Cuboids
Source: Nanomaterials (Basel). 2023 Jan 4;13(2):230. doi: 10.3390/nano13020230 (PMC9863918; doi:10.3390/nano13020230)
Supplement: Supplementary file 1 [file nanomaterials-13-00230-s001.zip › nanomaterials-2130214-supplementary.pdf]

## Supporting Information

# Low Overpotential Electrochemical Reduction of CO<sub>2</sub> to Ethanol Enabled by Cu/Cu<sub>x</sub>O Nanoparticles Embedded in Nitrogen-Doped Carbon Cuboids

Monther Q. Alkoshab <sup>1</sup>, Eleni Thomou <sup>2</sup>, Ismail Abdulazeez <sup>3</sup>, Munzir H. Suliman <sup>4</sup>, Konstantinos Spyrou <sup>2</sup>, Wissam Iali <sup>5,6</sup>, Khalid Alhooshani <sup>5</sup> and Turki N. Baroud <sup>3,7,\*</sup>

<sup>1</sup> Department of Mechanical Engineering, King Fahd University of Petroleum & Minerals, Dhahran 31261, Saudi Arabia

<sup>2</sup> Department of Materials Science and Engineering, University of Ioannina, 45110 Ioannina, Greece

<sup>3</sup> Interdisciplinary Research Center for Membranes and Water Security, King Fahd University of Petroleum & Minerals, Dhahran 31261, Saudi Arabia

<sup>4</sup> Interdisciplinary Research Center for Hydrogen and Energy Storage (IRC-HES), King Fahd University of Petroleum & Minerals (KFUPM), Dhahran 31261, Saudi Arabia

<sup>5</sup> Department of Chemistry, King Fahd University of Petroleum & Minerals, Dhahran 31261, Saudi Arabia

<sup>6</sup> Interdisciplinary Research Center for Refining and Advanced Chemicals, King Fahd University of Petroleum and & Minerals, Dhahran 31261, Saudi Arabia

<sup>7</sup> Department of Materials Science and Engineering, King Fahd University of Petroleum & Minerals, Dhahran 31261, Saudi Arabia

\* Correspondence: turkibaroud@kfupm.edu.sa

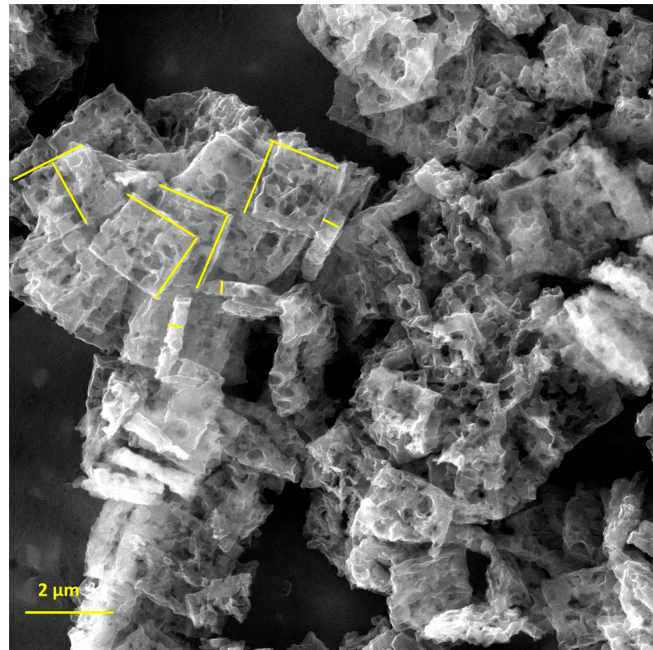

**Figure S1:** SEM image of the unleached PCC with side dimensions.

a)

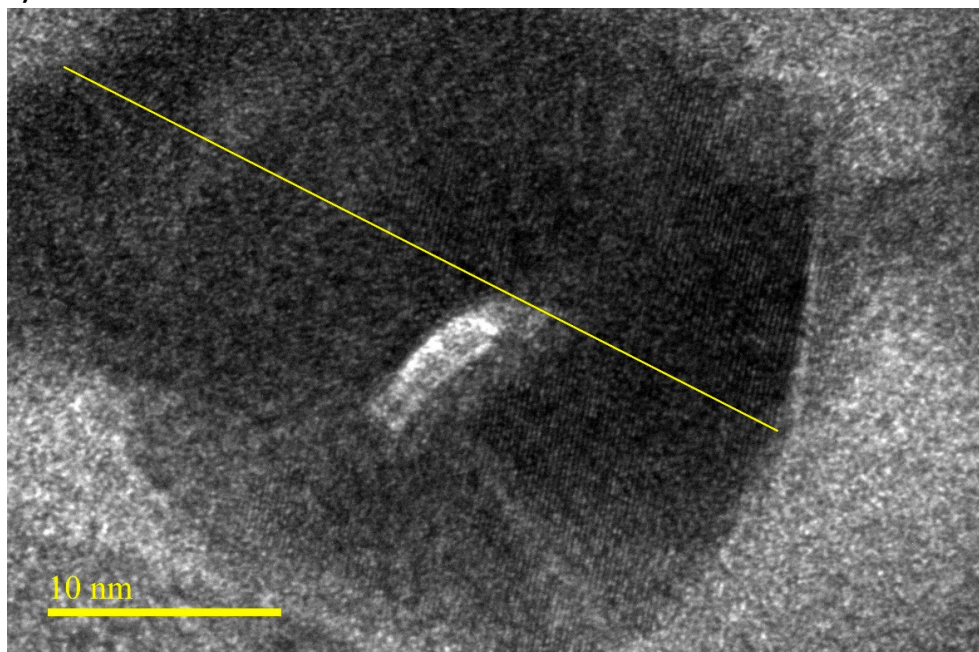

b)

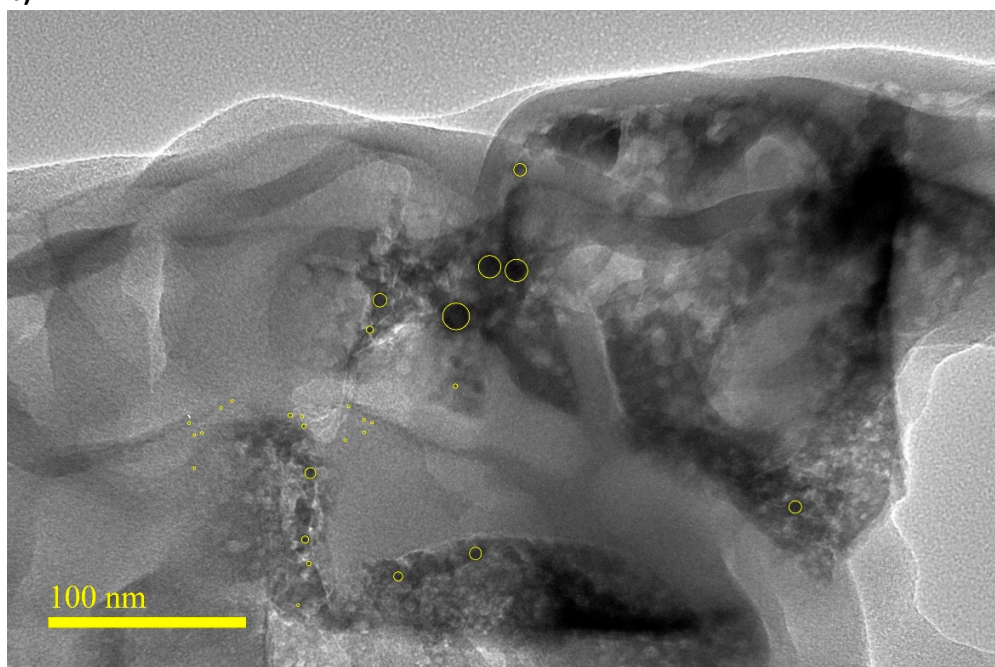

**Figure S2: (a) HRTEM image of one copper particle (b) HRTEM showing several nanoparticles**

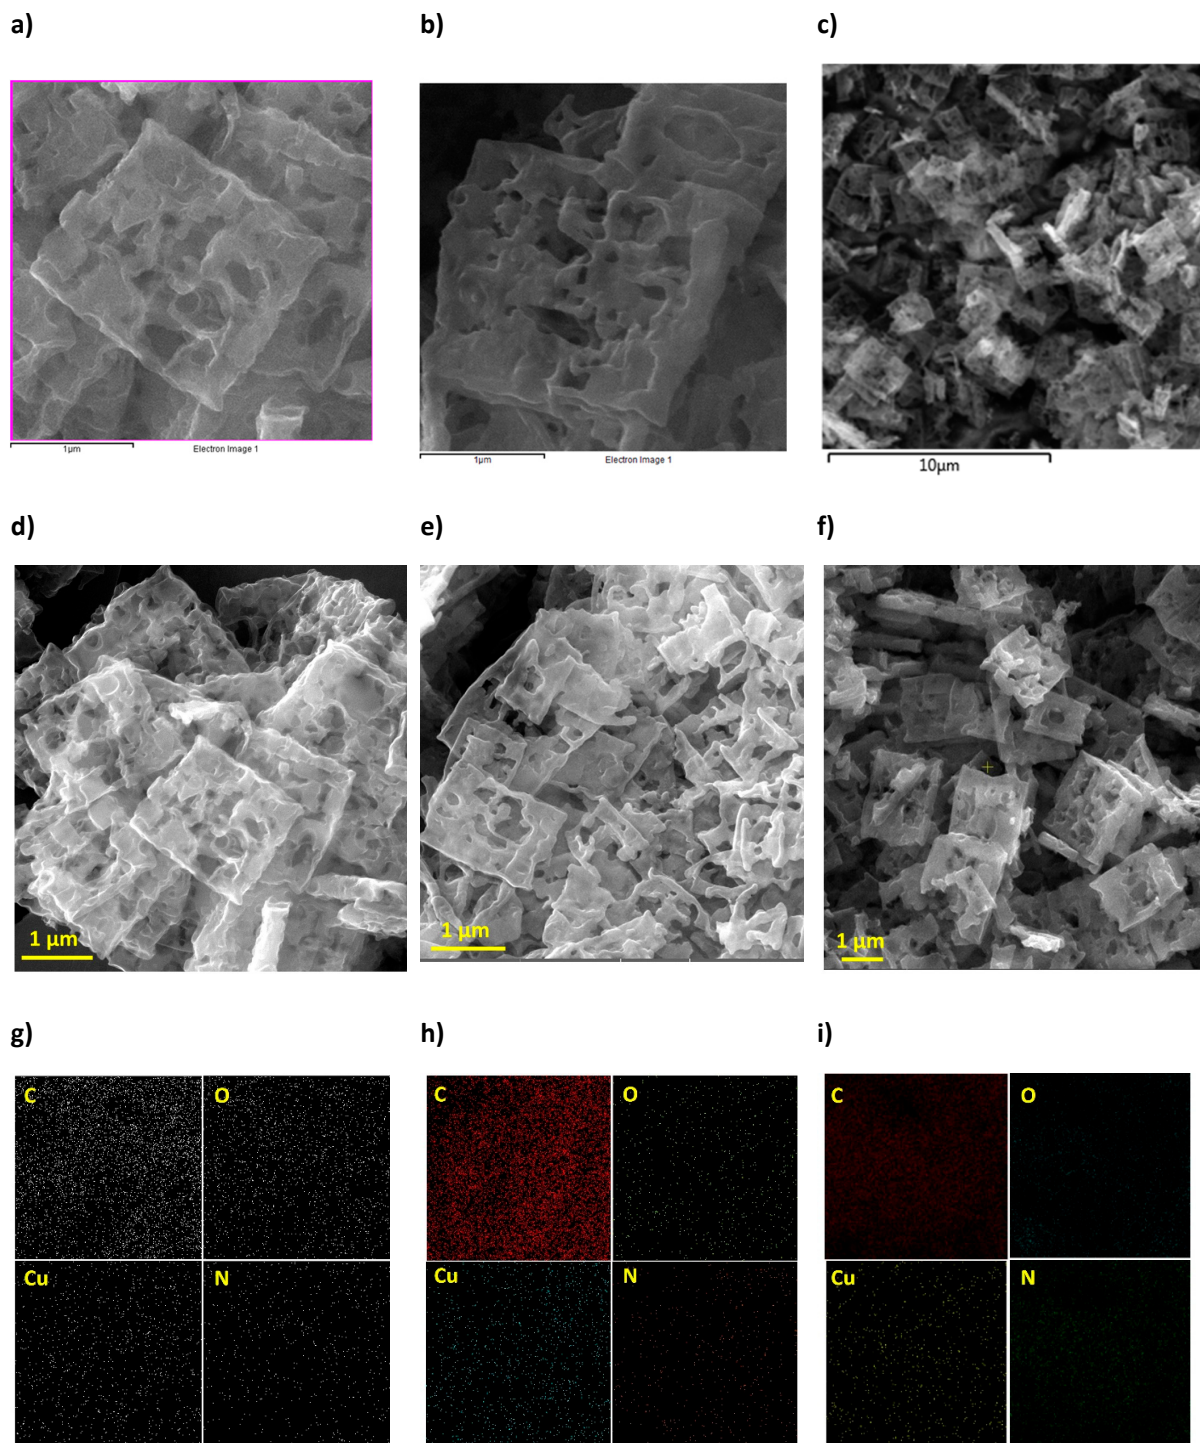

Figure S3: (a,d) SEM images of Cu/Cu<sub>x</sub>O-PCC-0h (b,e) SEM images of Cu/Cu<sub>x</sub>O-PCC-1h (c,f) SEM images of Cu/Cu<sub>x</sub>O-PCC-6h (g,h,i) elemental mapping images for Cu/Cu<sub>x</sub>O-PCC-0h, Cu/Cu<sub>x</sub>O-PCC-1h, Cu/Cu<sub>x</sub>O-PCC-6h, respectively

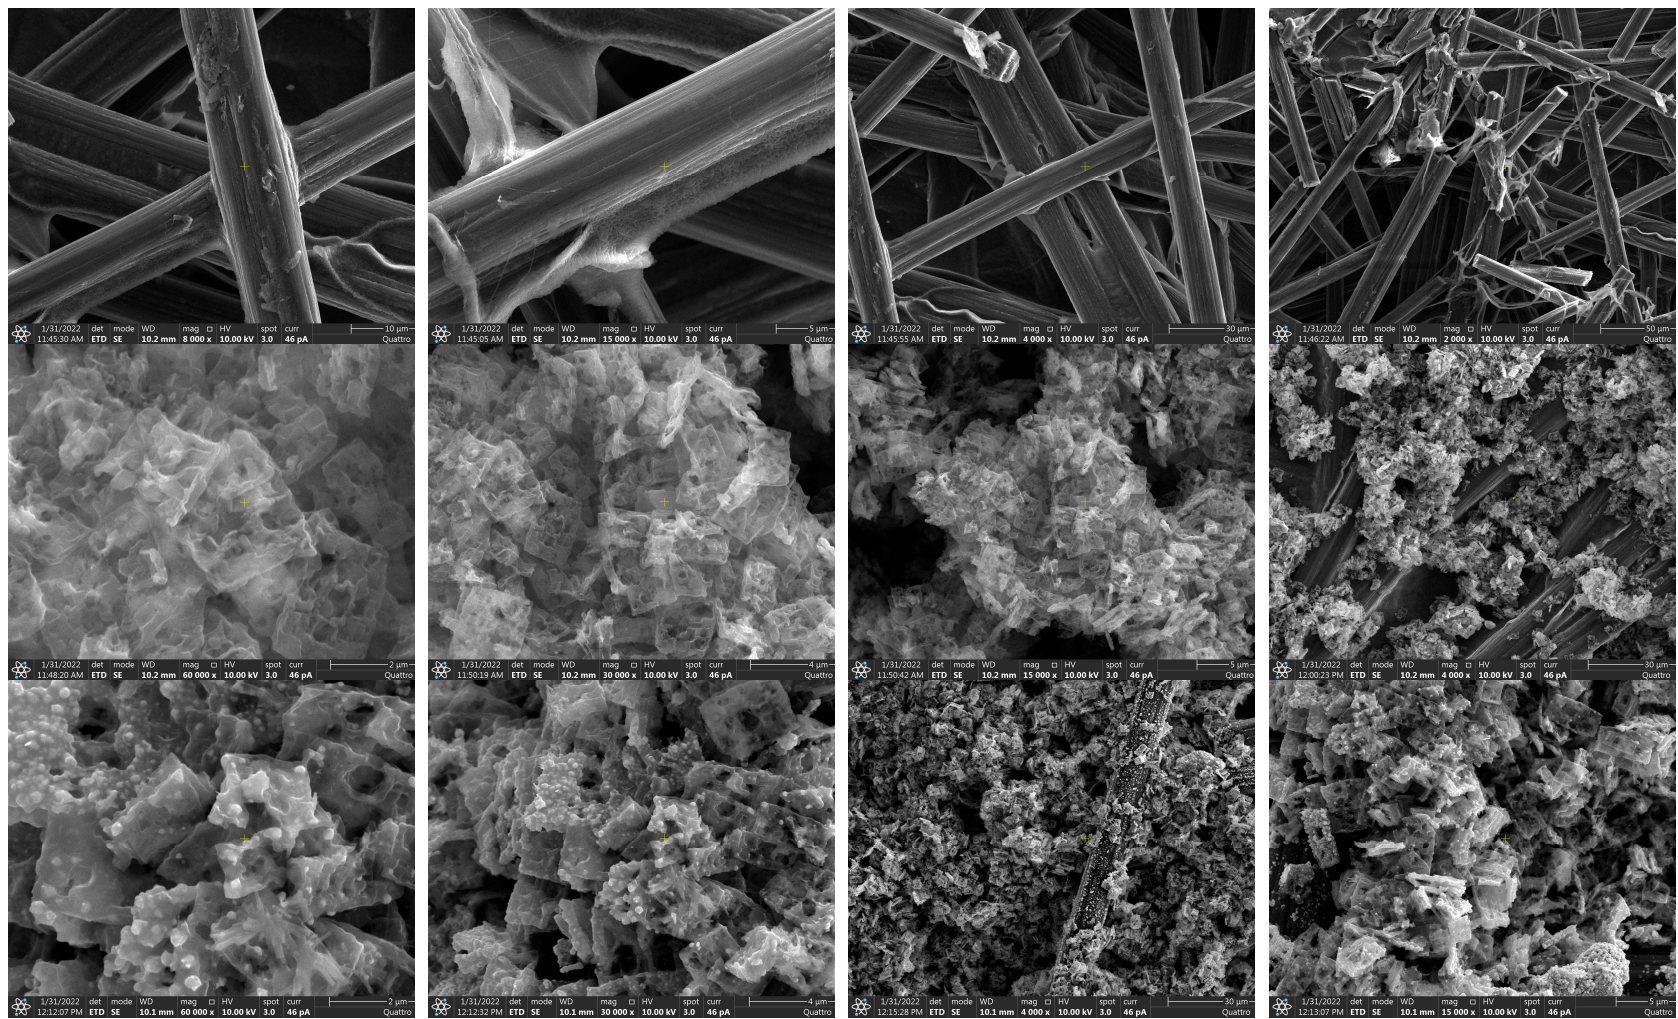

Figure S4: SEM images for the carbon paper (first row), Cu/CuO-PCC-0h loaded in carbon paper before electrolysis (second row), after electrolysis (third row)

a)

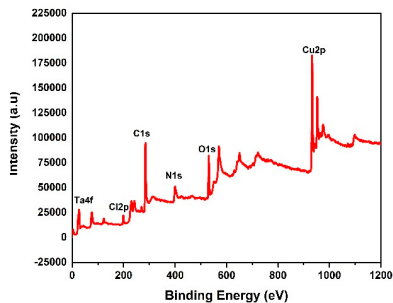

b)

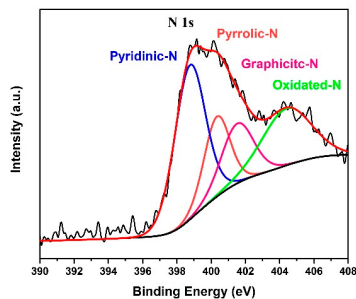

c)

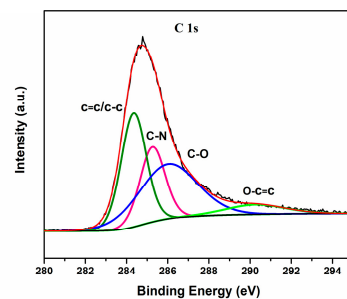

d)

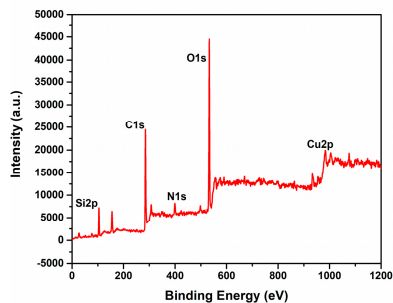

e)

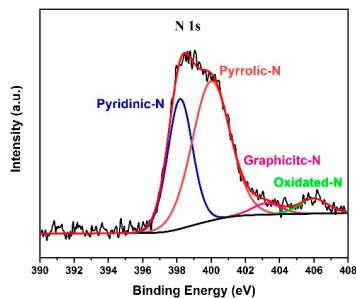

f)

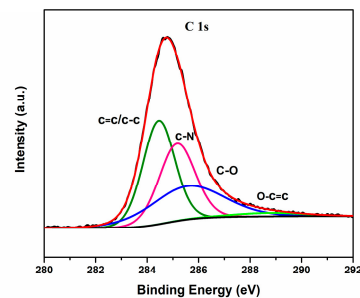

g)

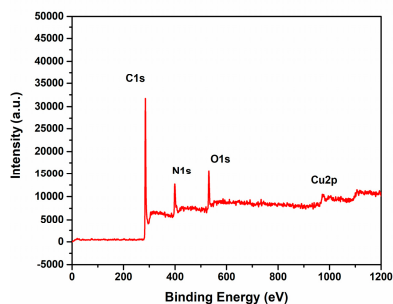

h)

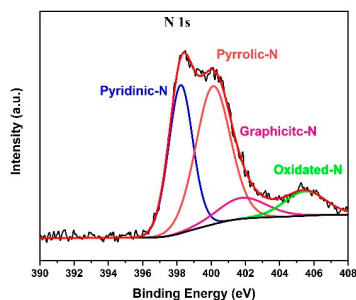

i)

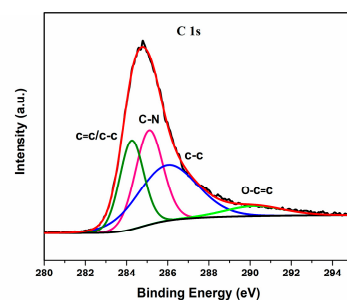

Figure S5: (a,d,g) XPS survey scans of Cu/Cu<sub>x</sub>O-PCC-0h, Cu/Cu<sub>x</sub>O-PCC-1h, Cu/Cu<sub>x</sub>O-PCC-6h, respectively (b,e,h) XPS high resolution spectra of N 1s of Cu/Cu<sub>x</sub>O-PCC-0h, Cu/Cu<sub>x</sub>O-PCC-1h, Cu/Cu<sub>x</sub>O-PCC-6h, respectively (c,f,i) XPS high resolution spectra of C 1s for of Cu/Cu<sub>x</sub>O-PCC-0h, Cu/Cu<sub>x</sub>O-PCC-1h, Cu/Cu<sub>x</sub>O-PCC-6h, respectively

Table S1: current densities at different potentials

| Potential vs RHE | Current density of Cu/Cu <sub>x</sub> O-PCC-0h [mA/cm <sup>2</sup> ] | Current density of Cu/Cu <sub>x</sub> O-PCC-1h [mA/cm <sup>2</sup> ] | Current density of Cu/Cu <sub>x</sub> O-PCC-6h [mA/cm <sup>2</sup> ] |
|------------------|----------------------------------------------------------------------|----------------------------------------------------------------------|----------------------------------------------------------------------|
| -0.5             | 0.119                                                                | 0.0752                                                               | 0.0627                                                               |
| -0.7             | 1.26                                                                 | 0.317                                                                | 0.106                                                                |
| -0.9             | 2.00                                                                 | 0.750                                                                | 0.566                                                                |
| -1.1             | 6.35                                                                 | 4.96                                                                 | 2.85                                                                 |

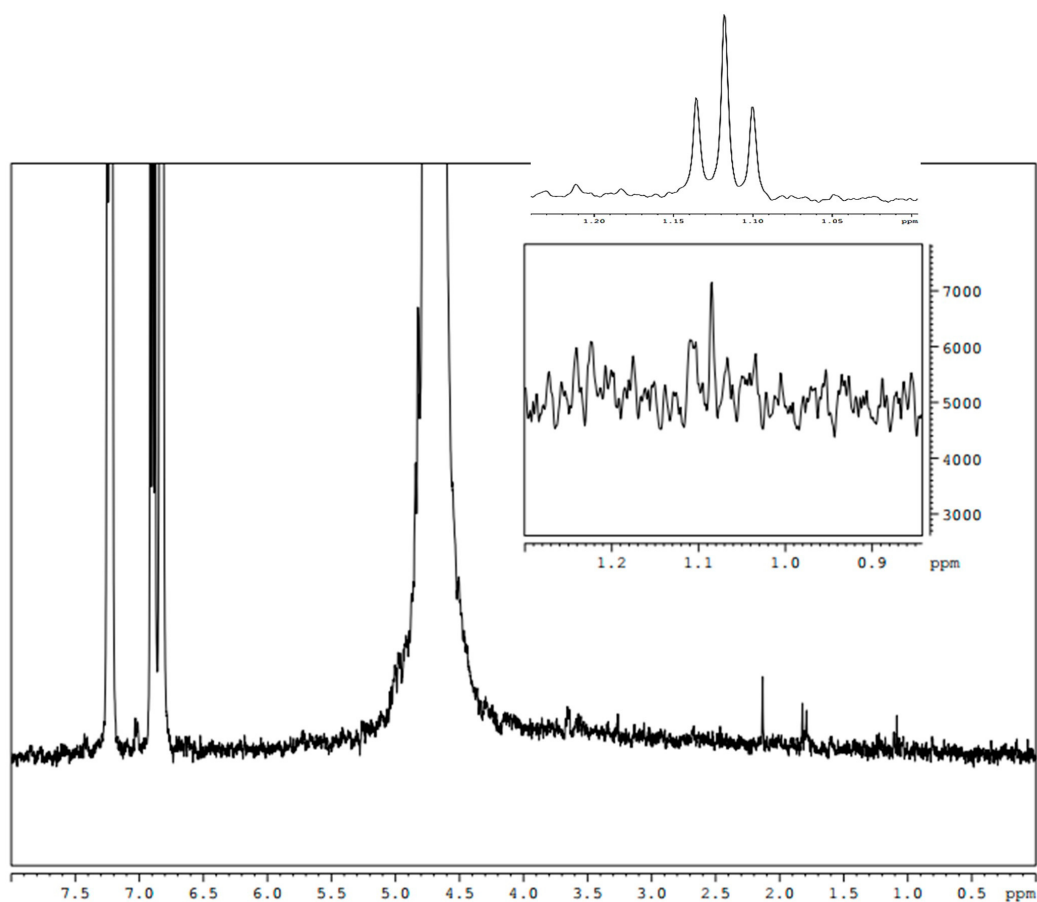

Figure S6: NMR spectrum showing Ethanol produced at -0.5 V vs RHE, ethanol peak from ethanol solution is shown in the top inset

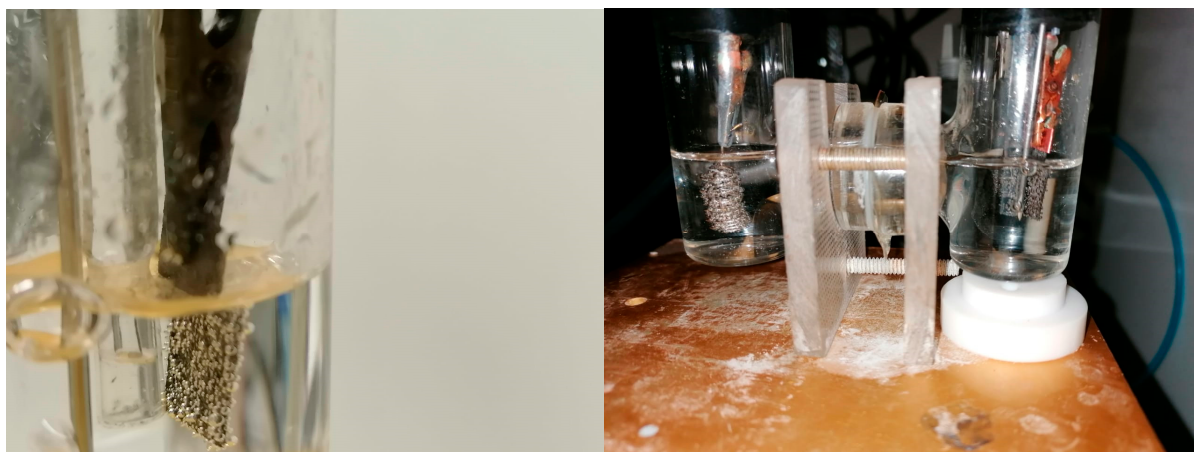

**Figure S7: Electrochemical Cell and working electrode during electrolysis**

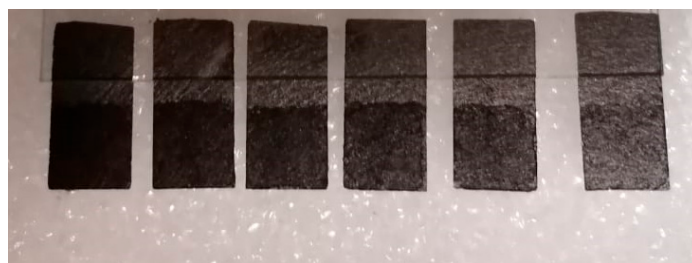

**Figure S8: Working electrode**
